# Supplementary material for: Tenomodulin Expression in the Periodontal Ligament Enhances Cellular Adhesion
Source: PLOS journal article supplement (doi:10.1371/journal.pone.0060203), 2013-04-10
Supplement: S5 (10.1371/journal.pone.0060203.s005) [file journal.pone.0060203.s005]

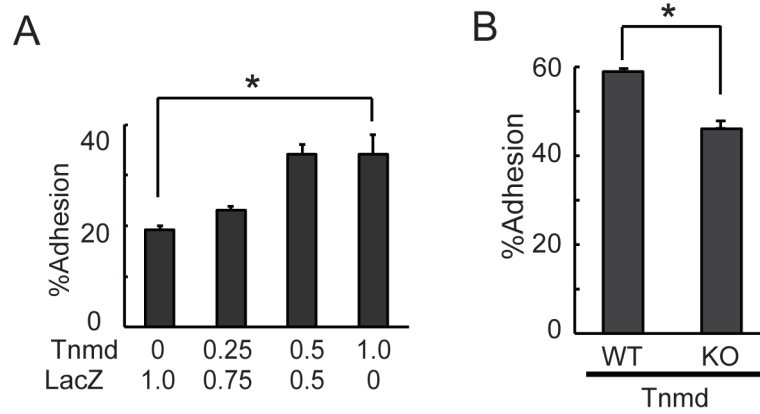

Figure S5. Effect of Tnmd of Tnmd mutant transfection on cell adhesion.

Cell adhesion assay to Fibronectin are shown. **(A)** Dose-dependent enhancement of cell adhesion by Tnmd. FLAG-tagged *Tnmd* was transfected in combination with pCAGGS-Venus in NIH3T3 cells. Cell adhesion to Fibronectin-coated culture dishes was determined. **(B)** Cell adhesion of WT and *Tnmd*-KO cells to Col I-coated culture dishes.
